# Supplementary material for: Intrasexual Vibrational Behavior of Philaenus spumarius in Semi-Field Conditions
Source: MDPI journal article supplement (doi:10.3390/insects12070584), 2021-06-28
Supplement: s1 [file s1]

# Supplementary Material: Intrasexual vibrational behavior of *Philaenus spumarius* in semi-field conditions

Imane Akassou, Sabina Avosani, Valentina Caorsi, Vincenzo Verrastro, Marco Ciolli, and Valerio Mazzoni

Table S1: Signaling activity per period of the day as Mean  $\pm$  standard deviation (SD).

| Sex     | Period of the day | Mean $\pm$ SD     | n  |
|---------|-------------------|-------------------|----|
| Males   | Morning           | 16.75 $\pm$ 17.10 | 12 |
|         | Afternoon         | 9.86 $\pm$ 8.75   | 12 |
|         | Evening           | 34.93 $\pm$ 31.27 | 12 |
| Females | Morning           | 53.32 $\pm$ 74.41 | 12 |
|         | Afternoon         | 53.12 $\pm$ 72.33 | 12 |
|         | Evening           | 74.07 $\pm$ 64.04 | 12 |

Table S2. Complete results of the Mann–Whitney pairwise test, with Bonferroni correction, to test differences in the type of signals for both sexes.

| Sex     | Contrast     | <i>p</i> -value |
|---------|--------------|-----------------|
| Males   | MCrS- Chirps | 1.00            |
|         | MCS- Chirps  | 2.0e-05         |
|         | MMS - Chirps | 1.00            |
|         | MCS- MCrS    | 4.1e-07         |
|         | MMS- MCrS    | 0.11            |
|         | MMS- MCS     | 1.1e-08         |
| Females | FCS- Chirps  | 1.0000          |
|         | FRjS- Chirps | 0.0734          |
|         | FRjS- FCS    | 0.0065          |

Table S3. Complete results of the Permanova test of the number of signals for both sexes. Bold numbers indicate significant differences.

| Sex     | Parameter           | Df  | SumsOfSqs | MeanSqs | F.Model | R2      | Pr(>F) |
|---------|---------------------|-----|-----------|---------|---------|---------|--------|
| Males   | Signal              | 3   | 8.5082    | 2.83608 | 24.9689 | 0.34154 | 0.001  |
|         | Individuals         | 2   | 1.1953    | 0.59765 | 5.2617  | 0.04798 | 0.002  |
|         | Signal: Individuals | 5   | 0.6692    | 0.13385 | 1.1784  | 0.02686 | 0.287  |
|         | Residuals           | 128 | 14.5388   | 0.11358 |         | 0.58362 |        |
|         | Total               | 138 | 24.9116   |         |         | 1.00000 |        |
| Females | Signal              | 2   | 1.0190    | 0.50952 | 3.1607  | 0.04152 | 0.016  |
|         | Individuals         | 2   | 0.3971    | 0.19854 | 1.2316  | 0.01618 | 0.280  |
|         | Signal:Individuals  | 4   | 2.3326    | 0.58314 | 3.6174  | 0.09504 | 0.001  |
|         | Residuals           | 129 | 20.7954   | 0.16120 |         | 0.84727 |        |
|         | Total               | 137 | 24.5441   |         |         | 1.00000 |        |

Table S4. Complete results of the analysis of multivariate homogeneity of group dispersions for both sexes as an assumption for the Permanova test. In the case of males the heterogeneity of dispersion was significant for the

number of individuals. Therefore, the low  $p$ -value in the Permanova test was not considered and no further pairwise test was conducted for this factor. Bold number indicate significant differences.

| Sex     | Parameter             |           | Df  | Sum Sq  | Mean Sq | F      | N.Perm | Pr(>F)       |
|---------|-----------------------|-----------|-----|---------|---------|--------|--------|--------------|
| Males   | Type of signals       | Groups    | 3   | 0.0831  | 0.028   | 0.7256 | 999    | 0.569        |
|         |                       | Residuals | 135 | 5.1520  | 0.038   |        |        |              |
|         | Number of individuals | Groups    | 2   | 0.13423 | 0.067   | 3.7768 | 999    | <b>0.023</b> |
|         |                       | Residuals | 136 | 2.41668 | 0.018   |        |        |              |
| Females | Type of signals       | Groups    | 2   | 0.0381  | 0.019   | 0.5427 | 999    | 0.577        |
|         |                       | Residuals | 135 | 4.7407  | 0.035   |        |        |              |
|         | Number of individuals | Groups    | 2   | 0.0438  | 0.022   | 0.5472 | 999    | 0.566        |
|         |                       | Residuals | 135 | 5.4002  | 0.0402  |        |        |              |

Table S5. Complete results of the Mann-Whitney pairwise test, with Bonferroni correction, to test differences in the type of signals in each number of signaling individuals in the case of females.

| Number of individuals | Contrast     | $p$ -value |
|-----------------------|--------------|------------|
| 1                     | FCS- Chirps  | 0.172      |
|                       | FRjS- Chirps | 0.013      |
|                       | FRjS- FCS    | 0.278      |
| 2                     | FCS- Chirps  | 0.119      |
|                       | FRjS- Chirps | 1.000      |
|                       | FRjS- FCS    | 0.072      |
| 3                     | FCS- Chirps  | 0.006      |
|                       | FRjS- Chirps | 1.000      |
|                       | FRjS- FCS    | 0.082      |
